# Supplementary material for: Advanced nanobubble flotation for enhanced removal of sub-10 µm microplastics from wastewater
Source: PubMed Central journal article supplement — Nat Commun. 2024 Oct 21;15:9079. doi: 10.1038/s41467-024-53304-3 (PMC11493987; doi:10.1038/s41467-024-53304-3), 2024-10-21
Supplement: 41467_2024_53304_MOESM2_ESM.pdf [file 41467_2024_53304_MOESM2_ESM.pdf]

## **Description of Additional Supplementary Files**

### **File Name: Supplementary Movie 1**

**Description:** This video records the simulated interaction process between a 6 nm PS particle and a 6nm bubble

### **File Name: Supplementary Movie 2**

**Description:** This video records the simulated interaction process between a 6 nm PS particle and a 15 nm bubble.
